# Supplementary material for: MPT64 assays for the rapid detection of Mycobacterium tuberculosis
Source: PubMed Central journal article supplement (PMC8035777; doi:10.1186/s12879-021-06022-w), 2021-04-10
Supplement: 12879_2021_6022_MOESM1_ESM.pdf [file 12879_2021_6022_MOESM1_ESM.pdf]

**Table 1. Characteristics of the studies included in the articles.**

| Author          | Study                             | Study Design          | Reference Test                                                                                                                                                                    | Sample size | Medium                   | Method of detection                            |
|-----------------|-----------------------------------|-----------------------|-----------------------------------------------------------------------------------------------------------------------------------------------------------------------------------|-------------|--------------------------|------------------------------------------------|
| Hoel, I         | Hoel 2020 <sup>[14]</sup>         | Cross Sectional Study | composite reference standard (CRS)                                                                                                                                                | 288         | liquid                   | ICC Staining ( Dako Envision + System-HRP kit) |
| Kumar, C        | Kumar2020 <sup>[15]</sup>         | Cross Sectional Study | Duplex PCR assay                                                                                                                                                                  | 92          | liquid                   | BD MGIT TBcID                                  |
| Sakashita, K    | Sakashita2020 <sup>[9]</sup>      | Cross Sectional Study | bacteriologically diagnosed                                                                                                                                                       | 80          | solid                    | ELISA                                          |
| Da, S           | Da 2019 <sup>[16]</sup>           | Cross Sectional Study | CRS                                                                                                                                                                               | 68          | liquid                   | ELISA                                          |
| Phetsuksiri, B  | Phetsuksiri 2019 <sup>[10]</sup>  | Cross Sectional Study | Culture followed by identification of MTC                                                                                                                                         | 151         | liquid                   | SD Bioline                                     |
| Yan, Z          | Yan 2018 <sup>[17]</sup>          | Cross Sectional Study | CRS                                                                                                                                                                               | 352         | unclear                  | BD OptEI Ae Reagent Set B ELISA kit            |
| Sanoussi, C     | Sanoussi2018 <sup>[18]</sup>      | Cross Sectional Study | spoligotyping or PNB/catalase                                                                                                                                                     | 327         | solid                    | SD Bioline                                     |
| Jorstad, M      | Jorstad 2018 <sup>[19]</sup>      | Cross Sectional Study | CRS                                                                                                                                                                               | 126         | Löwenstein–Jensen medium | t 1/250 dilution and Dako kit                  |
| Watanabe, P     | Watanabe 2018 <sup>[20]</sup>     | Cross Sectional Study | phenotypic techniques and molecular tests (such as conventional or real-time PCR, line probe assays and in-house (PCR and restriction-enzyme analysis) PRA-hsp65 molecular assay) | 375         | liquid/solid             | SD Bioline                                     |
| Turbawaty, D    | Turbawaty 2017 <sup>[21]</sup>    | Cross Sectional Study | acid-fast bacilli and mycobacterial culture                                                                                                                                       | 141         | liquid                   | ICT                                            |
| Kandhakumari, G | Kandhakumari 2017 <sup>[22]</sup> | Cross Sectional Study | Biochemistry method                                                                                                                                                               | 75          | solid                    | BD MGIT TBcID                                  |
| Kandhakumari, G | Kandhakumari 2017 <sup>[22]</sup> | Cross Sectional Study | Biochemistry method                                                                                                                                                               | 75          | solid                    | SD Bioline                                     |
| Orikiriza, P    | Orikiriza 2017 <sup>[23]</sup>    | Cross Sectional Study | Biochemistry method/Culturing of mycobacteria                                                                                                                                     | 188         | liquid                   | SD Bioline                                     |
| Nerurkar, V     | Nerurkar 2016 <sup>[24]</sup>     | Cross Sectional Study | Culturing of mycobacteria                                                                                                                                                         | 1093        | liquid                   | SD Bioline                                     |
| Kumar, N        | Kumar 2015 <sup>[8]</sup>         | Cross Sectional Study | Biochemistry method/Molecular method (PNB inhibition test)                                                                                                                        | 484         | Solid/liquid             | SD Bioline/BD MGIT/Capilia TB                  |
| Ji, M           | Ji 2014 <sup>[25]</sup>           | Cross Sectional Study | Culturing of mycobacteria                                                                                                                                                         | 504         | liquid                   | ELISA                                          |
| Zhu, C*         | Zhu 2013 <sup>[26]</sup>          | Cross Sectional Study | Biochemistry method/Culturing                                                                                                                                                     | 328         | solid                    | ELISA                                          |
| Zhu, C*         | Zhu 2013 <sup>[26]</sup>          | Cross Sectional Study | Biochemistry method/Culturing                                                                                                                                                     | 160         | solid                    | ELISA                                          |
| Hopprich, R     | Hopprich 2012 <sup>[27]</sup>     | Cross Sectional Study | Molecular method +Biochemistry method                                                                                                                                             | 200         | liquid                   | SD Bioline                                     |
| Kanade, S       | Kanade 2012 <sup>[28]</sup>       | Cross Sectional Study | molecular method                                                                                                                                                                  | 150         | solid                    | SD Bioline                                     |
| Roberts, S      | Roberts 2012 <sup>[29]</sup>      | Cross Sectional Study | molecular method                                                                                                                                                                  | 83          | liquid                   | BD MGIT TBcID                                  |
| Singh, A        | Singh 2012 <sup>[30]</sup>        | Cross Sectional Study | Culturing                                                                                                                                                                         | 161         | liquid                   | SD Bioline                                     |
| Martin, A       | Martin 2011 <sup>[31]</sup>       | Cross Sectional Study | molecular method                                                                                                                                                                  | 131         | liquid                   | BD MGIT TBcID                                  |
| Marzouk, M      | Marzouk 2011 <sup>[32]</sup>      | Cross Sectional Study | Biochemistry method/Culturing                                                                                                                                                     | 238         | Solid/liquid             | SD Bioline                                     |
| Ang, C          | Ang 2011 <sup>[33]</sup>          | Cross Sectional Study | Biochemistry method/Culturing                                                                                                                                                     | 294         | Solid/liquid             | SD Bioline                                     |
| Yu, M           | Yu 2011 <sup>[34]</sup>           | Cross Sectional Study | Biochemistry method/Culturing                                                                                                                                                     | 210         | liquid                   | BD MGIT TBcID                                  |
| Purohit, M      | Purohit 2007 <sup>[35]</sup>      | Cross Sectional Study | molecular method                                                                                                                                                                  | 203         | solid                    | DakoCytomation                                 |

|                |                                   |                       |                                                    |     |                                 |               |
|----------------|-----------------------------------|-----------------------|----------------------------------------------------|-----|---------------------------------|---------------|
| Mustafa, T     | Mustafa 2006 <sup>[36]</sup>      | Cross Sectional Study | molecular method                                   | 55  | liquid                          | NA            |
| Hirano, K      | Hirano 2004 <sup>[37]</sup>       | Cross Sectional Study | molecular method                                   | 545 | liquid                          | Capilia TB    |
| Hasegawa, N.   | Hasegawa 2002 <sup>[38]</sup>     | Cross Sectional Study | molecular method or Biochemistry method            | 304 | liquid                          | BD MGIT TBcID |
| Abe, C         | Abe 1999 <sup>[39]</sup>          | Cross Sectional Study | molecular method                                   | 108 | liquid                          | NA            |
| Gomathi, N     | Gomathi 2012 <sup>[11]</sup>      | Cross Sectional Study | Biochemistry method                                | 346 | Liquid                          | Capilia TB    |
| Maurya, A      | Maurya 2012 <sup>[40]</sup>       | Cross Sectional Study | Biochemistry method                                | 150 | Liquid                          | SD Biline     |
| Povazan, A     | Povazan 2012 <sup>[41]</sup>      | Cross Sectional Study | Biochemistry method                                | 123 | Liquid                          | BD MGIT TBcID |
| Barouni, A S   | Barouni, A S 2012 <sup>[42]</sup> | Cross Sectional Study | Biochemistry method                                | 161 | Liquid                          | BD MGIT TBcID |
| Cojocar, Elena | Cojocar 2012 <sup>[43]</sup>      | Cross Sectional Study | Biochemistry method                                | 47  | Liquid/Solid                    | SD Biline     |
| Brent, A       | Brent 2011 <sup>[44]</sup>        | Cross Sectional Study | molecular method                                   | 208 | liquid                          | BD MGIT TBcID |
| Gaillard, T    | Gaillard 2011 <sup>[45]</sup>     | Cross Sectional Study | molecular techniques                               | 349 | solid/liquid                    | SD Biline     |
| Gaillard, T    | Gaillard 2011 <sup>[45]</sup>     | Cross Sectional Study | molecular techniques                               | 349 | solid/liquid                    | BD MGIT TBcID |
| Lu, P          | Lu 2011 <sup>[46]</sup>           | Cross Sectional Study | immunochromatographic assay                        | 291 | Löwenstein–Jensen medium/liquid | BD MGIT TBcID |
| Said, H        | Said 2011 <sup>[47]</sup>         | Cross Sectional Study | molecular assays                                   | 225 | liquid                          | BD MGIT TBcID |
| Tohir, A       | Tohir 2011 <sup>[48]</sup>        | Cross Sectional Study | standard biochemical detection                     | 171 | Löwenstein–Jensen medium        | SD Biline     |
| Muyoyeta, M    | Muyoyeta 2010 <sup>[49]</sup>     | Cross Sectional Study | phenotypic, biochemical, and molecular techniques. | 623 | solid/liquid                    | Capilia TB    |
| Hillemann, D   | Hillemann 2005 <sup>[50]</sup>    | Cross Sectional Study | Molecular method                                   | 172 | Liquid/Solid                    | Capilia TB    |
| Wang, J        | Wang 2007 <sup>[51]</sup>         | Cross Sectional Study | Biochemistry method/Culturing                      | 242 | Liquid                          | Capilia TB    |
| Ismail, N      | Ismail 2009 <sup>[52]</sup>       | Cross Sectional Study | Biochemistry method/Culturing                      | 96  | Liquid                          | SD Biline     |
| Ngamlert K     | Ngamlert 2009 <sup>[53]</sup>     | Cross Sectional Study | Biochemistry method/Culturing                      | 247 | Liquid                          | Capilia TB    |
| Shen, G        | Shen 2009 <sup>[54]</sup>         | Cross Sectional Study | Biochemistry method/Culturing                      | 233 | Liquid                          | Capilia TB    |
| Chihota, V     | Chihota 2010 <sup>[55]</sup>      | Cross Sectional Study | Biochemistry method                                | 340 | Liquid/Solid                    | Capilia TB    |

CRS=composite reference standard; MTC=Mycobacterium tuberculosis complex; PNB=ParaNitrobenzoic Acid.

\*: 328 were serum samples, 160 from patients with definite pulmonary tuberculosis.
